# Supplementary material
Source: publisher site journal article supplement (https://www.spandidos-publications.com/5216/downloadSupplementary)
Supplement: Supplementary file 1 [file downloadSupplementary]

## Sheet: Sheet1
Table SIV. Gene enrichment of RCD-related pathways.
RCD type	Name	ID	GENE
Apoptosis	execution phase of apoptosis	GO:0097194	DSG3;CDKN2A;PKP1;CDH1;PRKCQ;COLEC11;CIDEB;IL6;XKR6;ACVR1C;OCLN;CASP9;CASP1;CXCR3;CASP14;DICER1;VIM;AIFM3
	cellular component disassembly involved in execution phase of apoptosis	GO:0006921
Autophagy	regulation of autophagy	GO:0010506	SLC17A9;CDKN2A;PPARGC1A;KCNK3;MEFV;CD93;EEF1A2;NLRP6;SLC22A3;DKKL1;HPR;KDR;RAB33A;ITPR1;PRKAA2;LRRK2;LIX1L;LEPR;CSPG5;PIK3C2B;CASP1;DCN;STK32A;HDAC6;ULK1;ATG16L2;PIM2;DAP;VPS37D;WDR45;GOLGA2;UBQLN2;WIPI1;RETREG1;TPCN1;BCL2L11;GPSM1;RASIP1;ATP6V1C2;OBSCN;FUNDC1;BMP2KL;LENG9;PLEKHF1;TOMM22;KRCC1;ATG4D;PIK3CA;HSPB1;TP53INP1;ATP6V1C1;STK11;CSNK2A2;CTTN;SUPT3H;ITGB4;HSP90AA1;ACER2;REP15;HTR2B;ACTL6A;D…
	autophagy	GO:0006914
	positive regulation of autophagy	GO:0010508
Pyroptosis	pyroptosis	GO:0070269	AIM2;GSDMC;GSDMA;CASP1
